# Supplementary material for: The Multi-Omics Landscape and Clinical Relevance of the Immunological Signature of Phagocytosis Regulators: Implications for Risk Classification and Frontline Therapies in Skin Cutaneous Melanoma
Source: MDPI journal article supplement (doi:10.3390/cancers14153582), 2022-07-22
Supplement: s1 [file s1]

# Supplementary Material: The Multi-Omics Landscape and Clinical Relevance of the Immunological Signature of Phagocytosis Regulators: Implications for Risk Classification and Frontline Therapies in Skin Cutaneous Melanoma

Jiahua Xing, Lingli Guo, Ziqi Jia, Yan Li and Yan Han \*

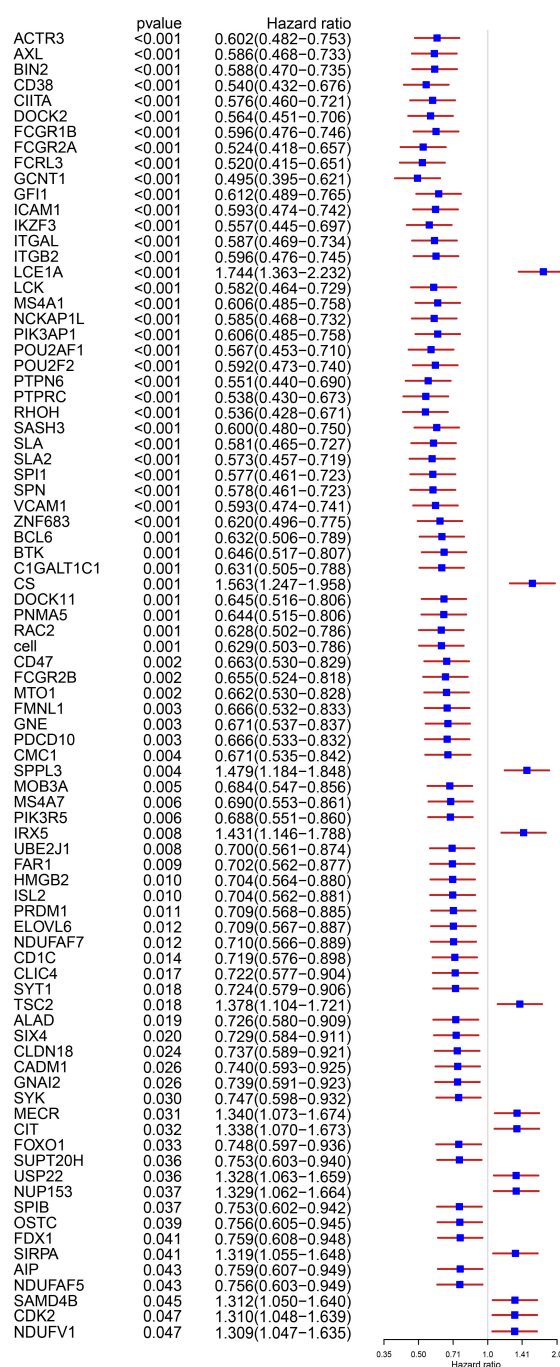

**Figure S1.** Forest plot of 84 genes significantly associated with prognosis. We screened 84 genes significantly associated with survival using univariate Cox regression, with 13 genes having HR > 1 and 71 genes having HR < 1.

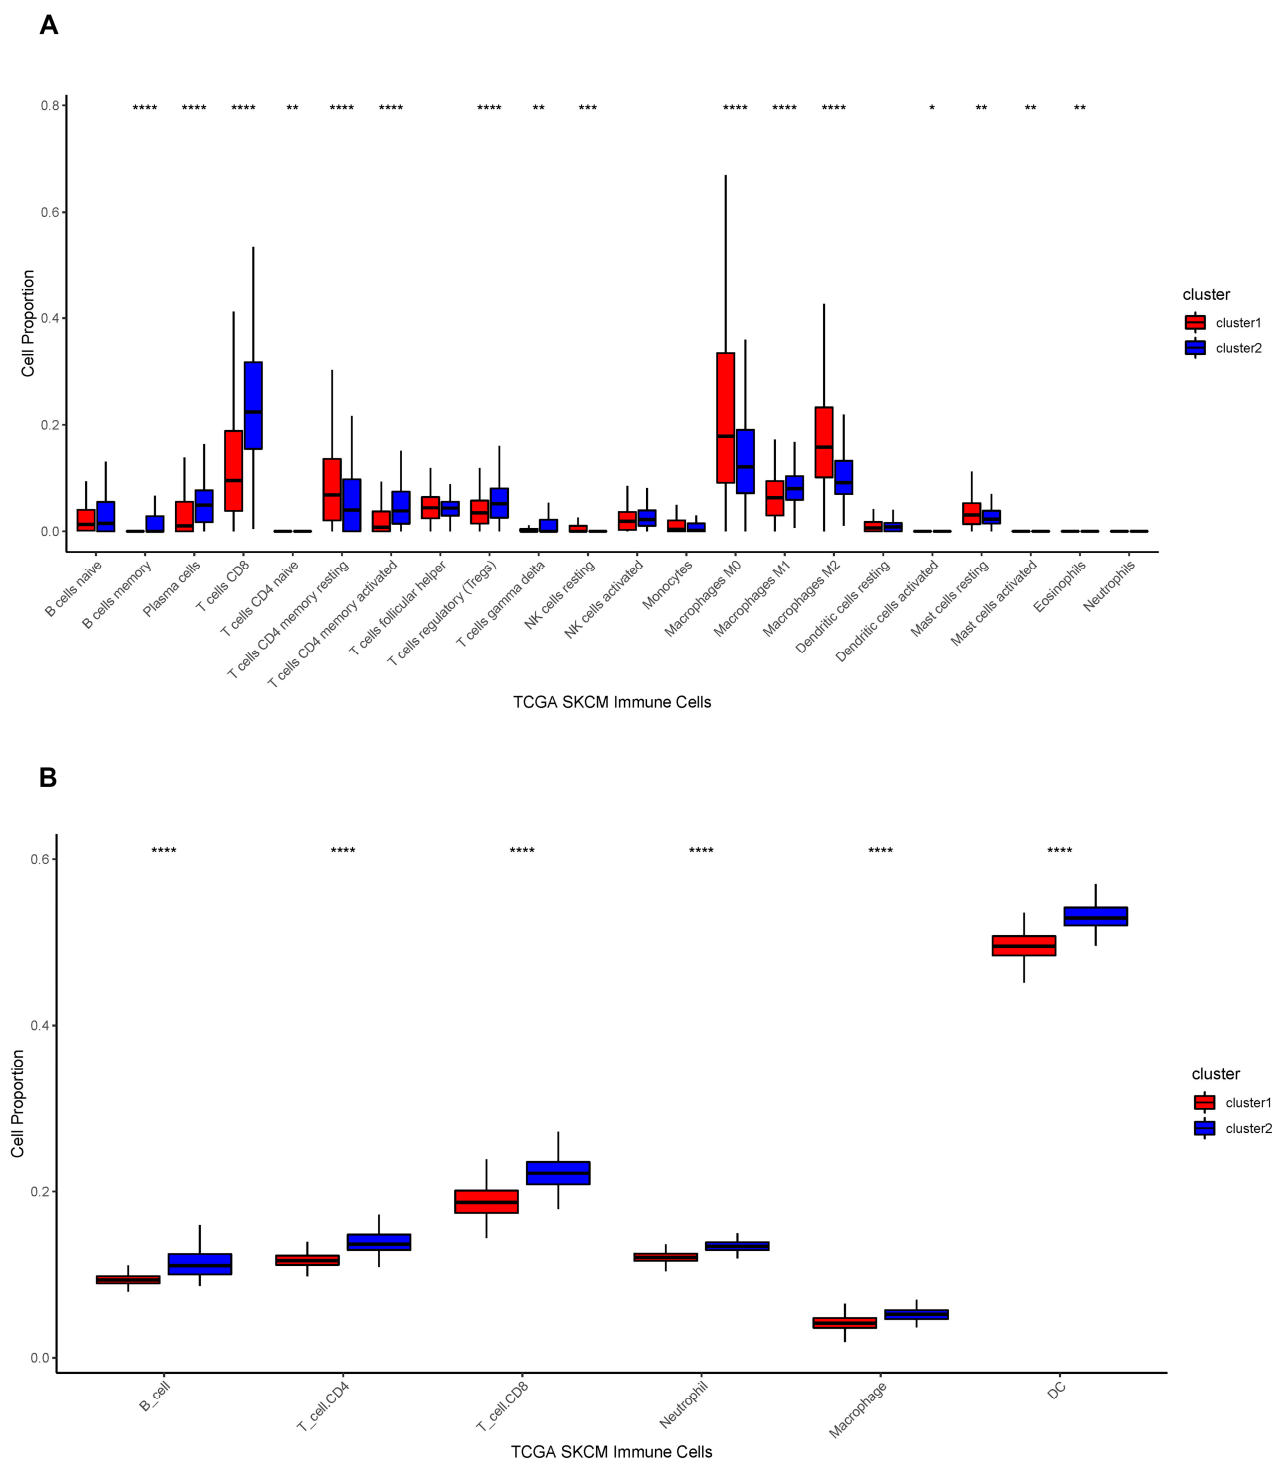

**Figure S2.** Calculating the proportion of immune cells in cancer samples by different methods. (A) Calculating the proportion of immune cells in cancer samples using the R package CIBERSORT. (B) Calculating the proportion of immune cells in cancer samples using the online database TIMER.

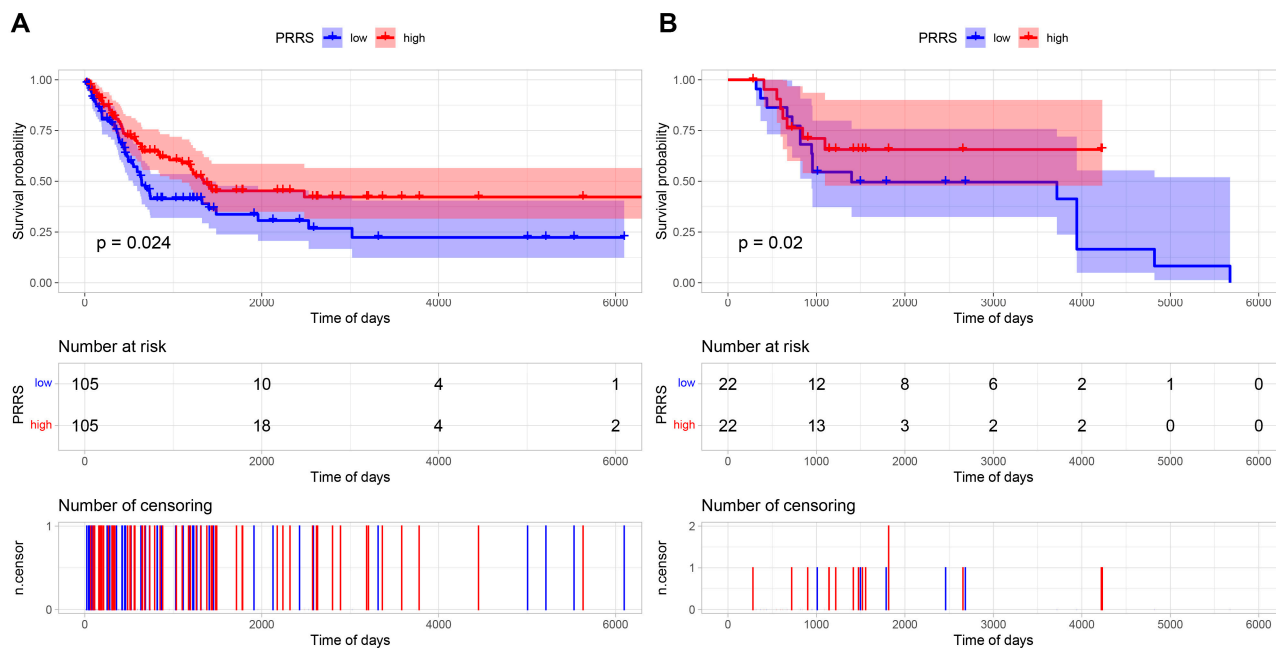

**Figure S3.** Validation of PRRS in other datasets. (A) The performance of PRRS in the dataset GSE65904 was validated, and the results showed statistically significant results ( $P=0.024$ ). (B) The performance of PRRS in the dataset GSE19234 was validated, and the results showed statistically significant results ( $P=0.02$ ).

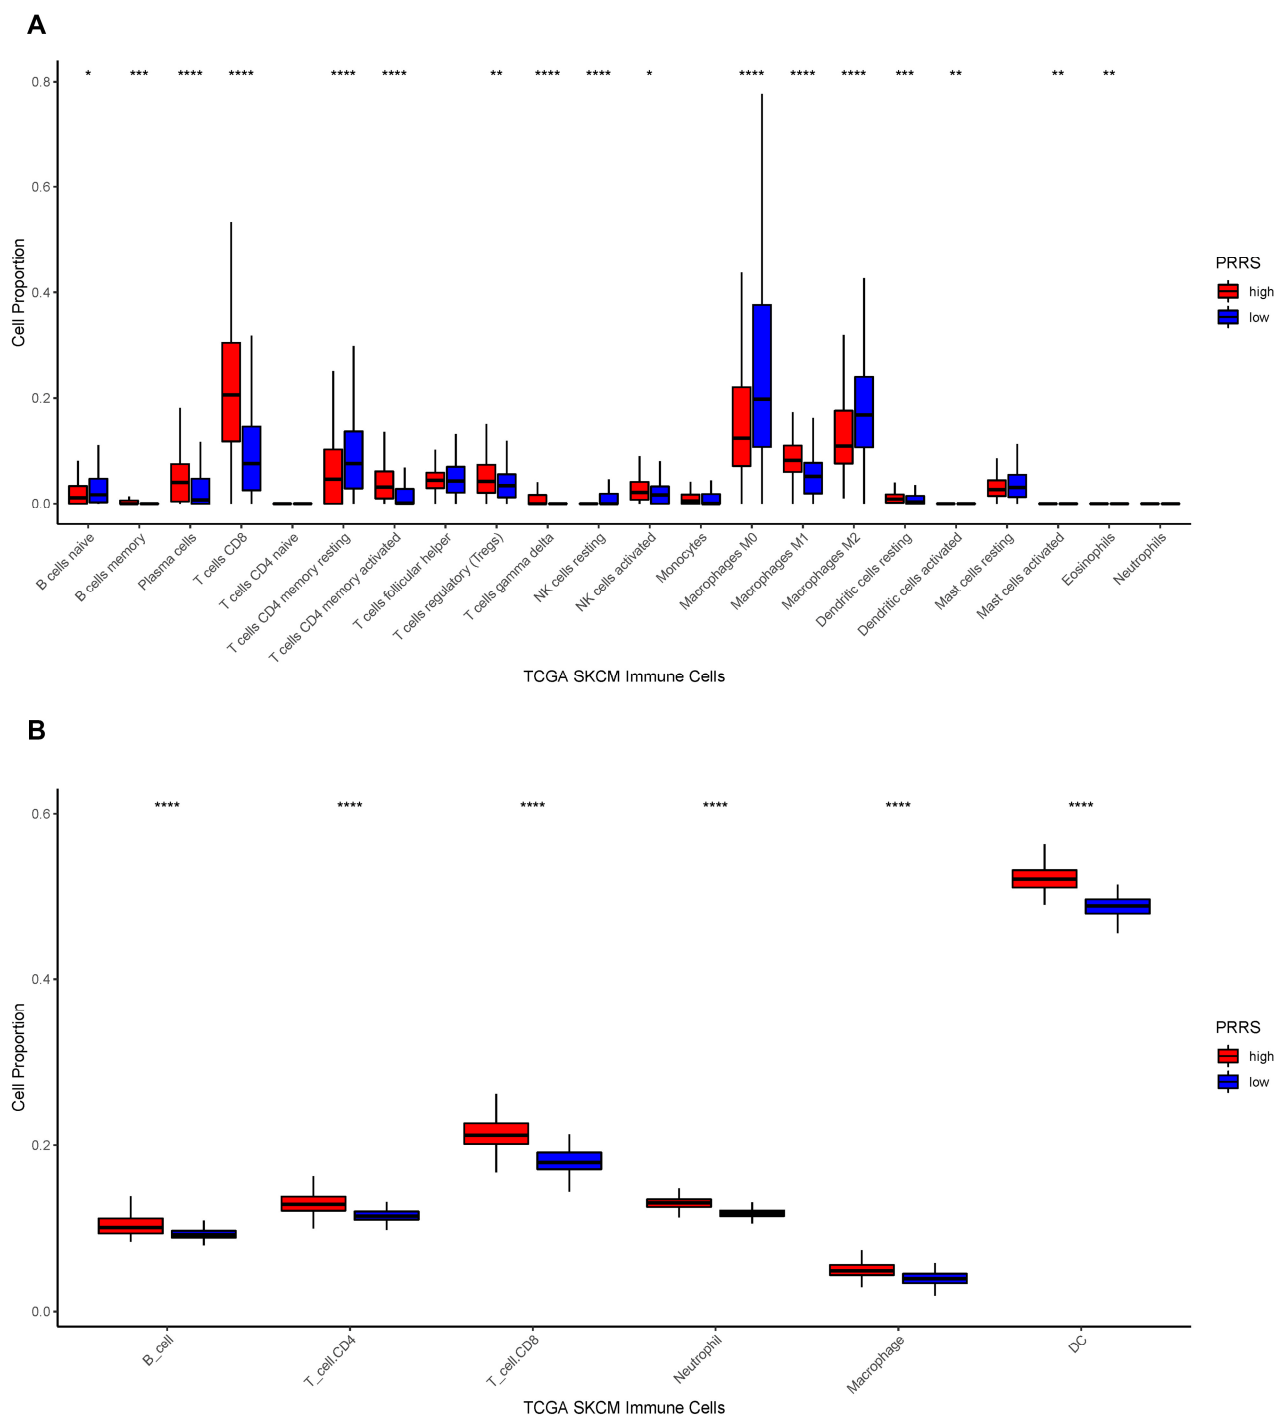

**Figure S4:** Analysis of differences in the proportion of immune infiltrating cells between high and low PRRS groups by different methods. **(A)** Analysis of differences in the proportion of immune infiltrating cells between high and low PRRS subgroups using CIBERSORT. **(B)** Analysis of differences in the proportion of immune infiltrating cells between high and low PRRS subgroups using the online database TIMER.

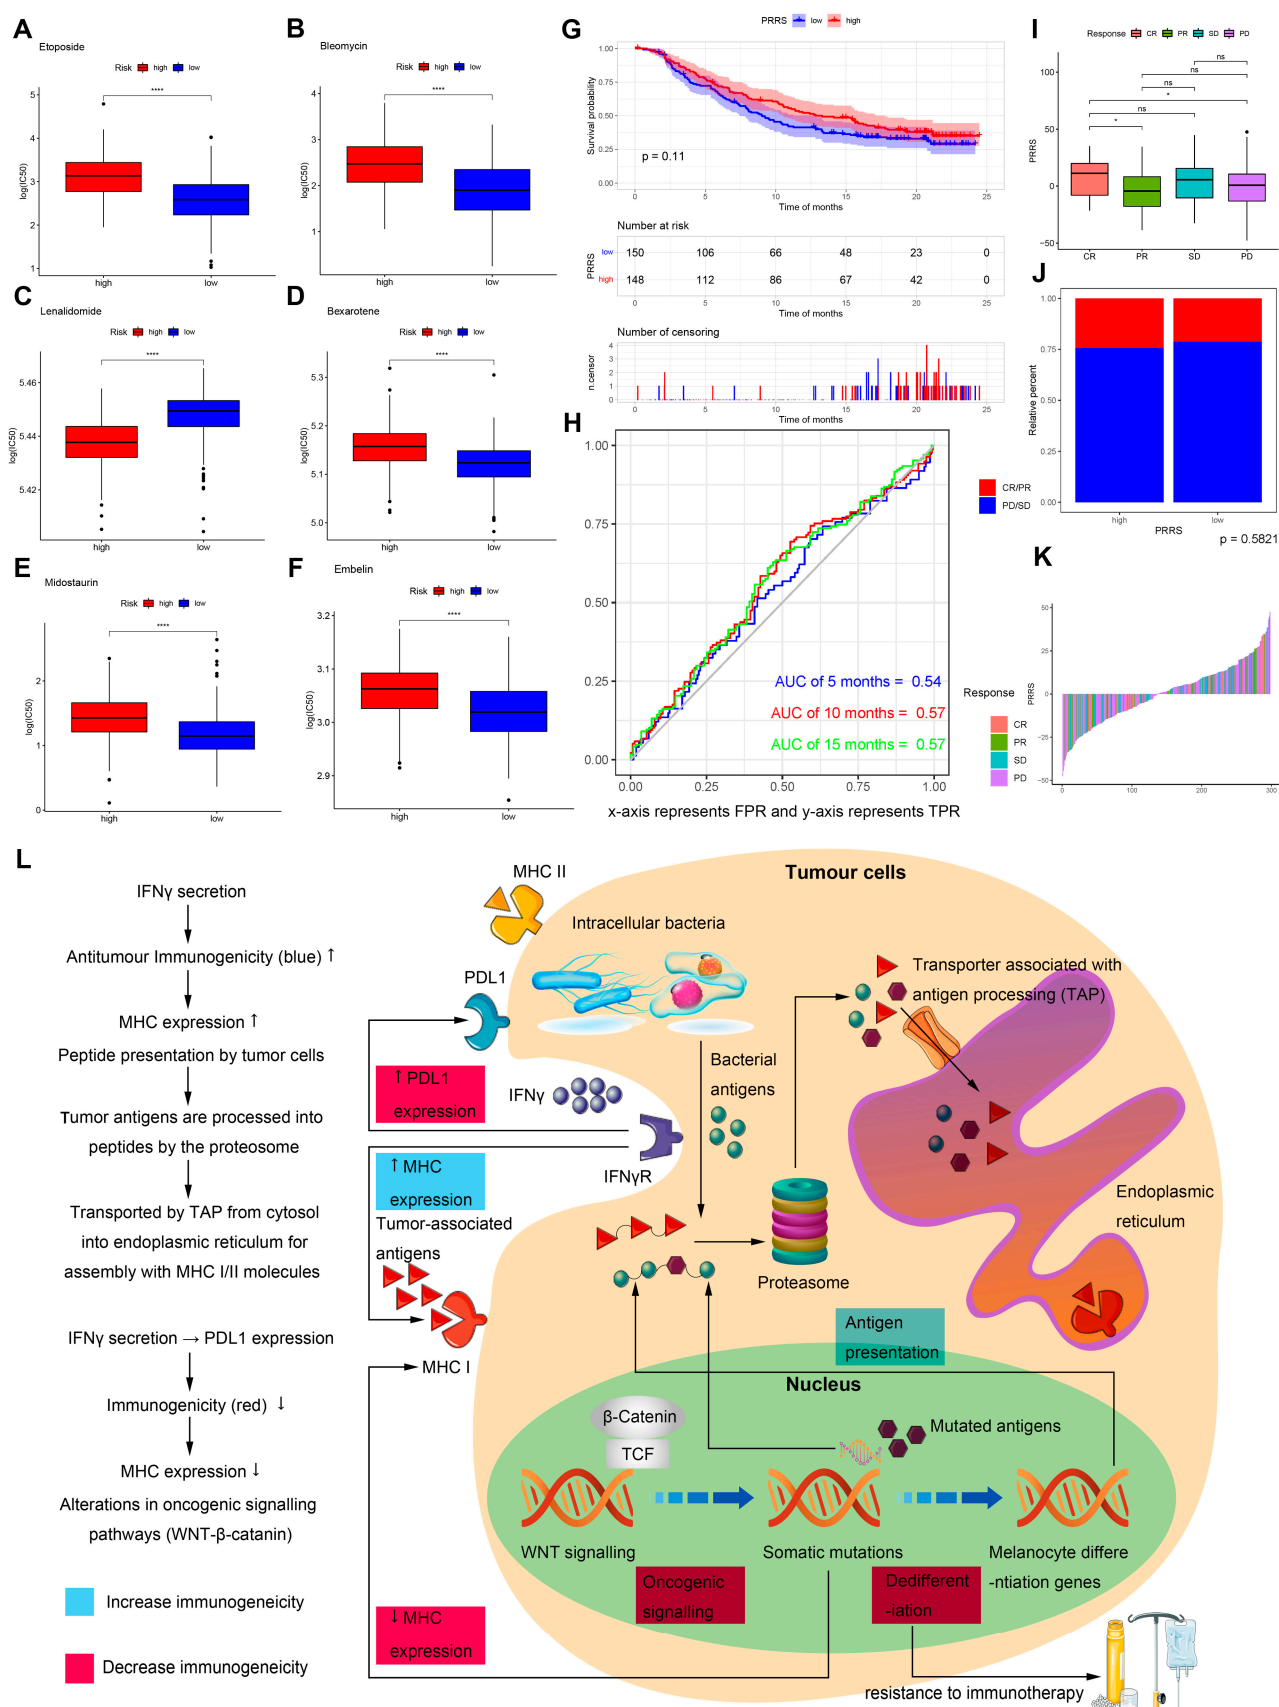

**Figure S5:** Potential treatment strategies based on PRRS. (A–F) Prediction of drug resistance to diffFigure 138. drugs, taking six significantly different drugs and typical for presentation, including Etoposide, Bleomycin, Lenalidomide, Bexarotene, Midostaurin and Embelin (ns, not significant, \* $P < 0.05$ , \*\* $P < 0.01$ , \*\*\* $P < 0.001$ , \*\*\*\* $P < 0.0001$ ). (G–K) Risk model validation of IMvigor210 data. (G) Kaplan-Meier curves for high and low PRRS groups. (H) AUC time-dependent receiver operating characteristic (ROC) curves. (I) Statistics on the distribution of PRRS scores in each immune effect

classification. Our results showed that the PRRS scores of CR samples were significantly higher than those of PR and PD samples. (J) Distribution statistics of immunotherapy response in high and low PRRS groups. (K) Bar chart display of PRRS subtype score for different response type samples. (L) Skin cutaneous melanoma intrinsic mechanisms and their effect on the antitumor immune response.

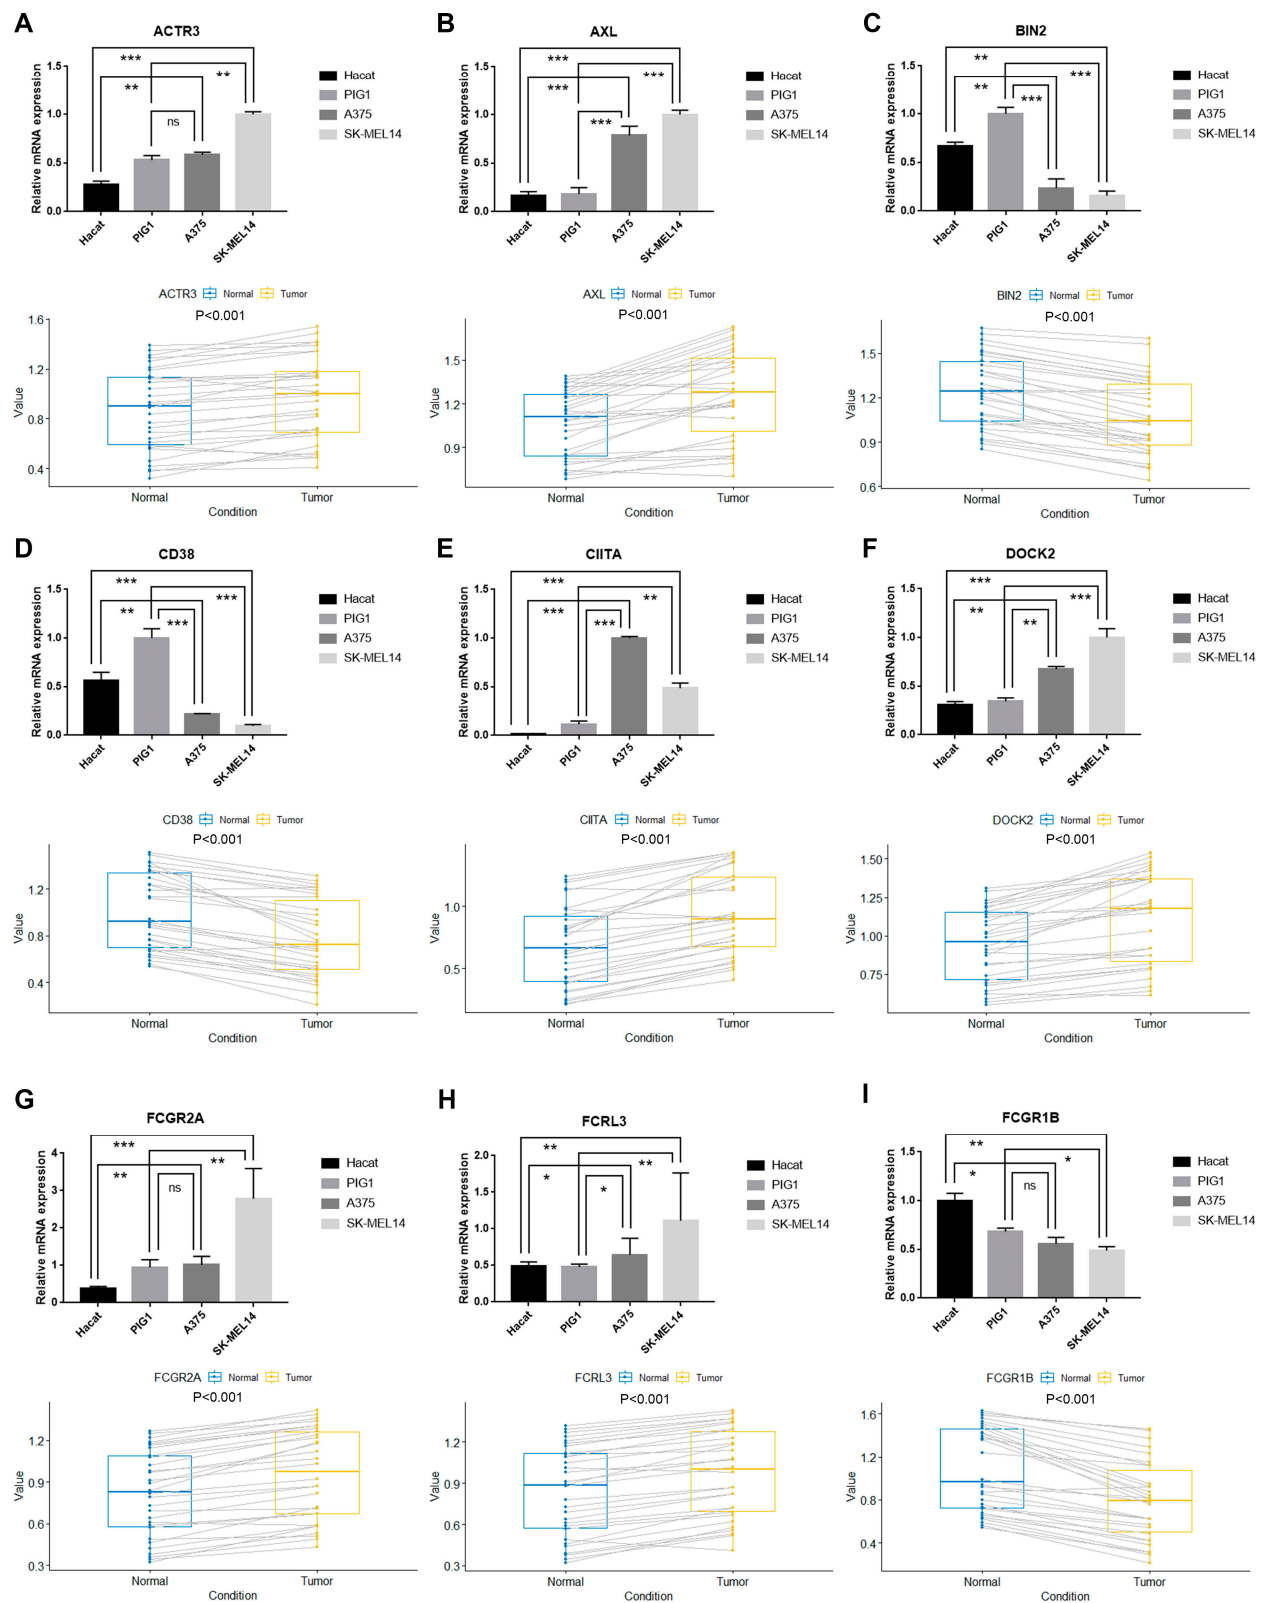

**Figure S6:** Validation of the mRNA expression of expression-based regulators of survival significantly associated with phagocytosis. The display of this picture contains the qRT-PCR results from four cell lines (Hacat, PIG1, A375 and SK-MEL 14), as well as the qRT-PCR results of tissue specimens from 30 patients, which taken from normal skin and SKCM. Our results included nine expression-based regulators of survival significantly associated with phagocytosis, including ACTR3, AXL, BIN2, CD38, CIITA, DOCK2, FCGR2A, FCRL3 and FCGR1B (A-I). Our results showed that the expression of ACTR3, AXL, CIITA, DOCK2, FCGR2A, and FCRL3 was significantly higher in SKCM than in normal skin tissues. The expression of BIN2, CD38, and FCGR1B was significantly lower in SKCM than in normal skin tissues (ns, not significant, \* $P < 0.05$ , \*\* $P < 0.01$ , \*\*\* $P < 0.001$ , \*\*\*\* $P < 0.0001$ ).

**Table S1.** Differences in expression of phagocytosis regulators among different subgroups (shown as significant results).

| name        | P<br>age <sup>1</sup> | P<br>gender <sup>2</sup> | P<br>pm <sup>3</sup> | P<br>pn <sup>4</sup> | P<br>pt <sup>5</sup>  | P<br>stage <sup>6</sup> | P<br>breslow <sup>7</sup> | P<br>clark <sup>8</sup> |
|-------------|-----------------------|--------------------------|----------------------|----------------------|-----------------------|-------------------------|---------------------------|-------------------------|
| ABI1        | 0.826179              | 0.427429                 | 0.297338             | 0.724546             | 0.270321              | 0.345915                | 0.221831                  | 0.405117                |
| ACTB        | 0.177925              | 0.903116                 | 0.898021             | 0.353593             | 0.148032              | 0.948327                | 0.72902                   | 0.938258                |
| ACTR2       | 0.740369              | 0.645357                 | 0.748661             | 0.914086             | 0.000385              | 0.002674                | 0.000213                  | 0.035321                |
| ACTR3       | 0.843407              | 0.94783                  | 0.891352             | 0.769605             | 0.001345              | 0.000233                | 0.003275                  | 0.021096                |
| ADAM10      | 0.483863              | 0.554462                 | 0.118791             | 0.669105             | 0.771445              | 0.208582                | 0.314034                  | 0.288873                |
| AIFM1       | 0.885945              | 0.545194                 | 0.470445             | 0.863625             | 0.618138              | 0.320621                | 0.034992                  | 0.723164                |
| AIP         | 0.994604              | 0.266615                 | 0.156128             | 0.087063             | 0.799077              | 0.489598                | 0.293342                  | 0.608782                |
| ALAD        | 0.873592              | 0.440745                 | 0.978474             | 0.18848              | 0.300869              | 0.456552                | 0.943594                  | 0.279263                |
| ALCAM       | 0.292912              | 0.53504                  | 0.801609             | 0.086682             | 0.010867              | 0.059606                | 0.002173                  | 0.821731                |
| AMBRA1      | 0.248393              | 0.305541                 | 0.42999              | 0.114168             | 0.842659              | 0.176599                | 0.548444                  | 0.975022                |
| ANAPC7      | 0.689375              | 0.367552                 | 0.636801             | 0.064876             | 0.058397              | 0.127247                | 0.163128                  | 0.272784                |
| APMAP       | 0.693575              | 0.829529                 | 0.532662             | 0.966432             | 0.13651               | 0.820429                | 0.969481                  | 0.98674                 |
| ARHGDIG     | 0.279088              | 0.561928                 | 0.885845             | 0.13714              | 0.126403              | 0.102046                | 0.036106                  | 0.236186                |
| ARID1A      | 0.585809              | 0.561341                 | 0.334751             | 0.023984             | 0.003416              | 0.000561                | 0.000135                  | 0.003867                |
| ARID1B      | 0.443072              | 0.18538                  | 0.818603             | 0.041991             | 0.011906              | 0.029582                | 0.003091                  | 0.117779                |
| ARPC2       | 0.499104              | 0.28563                  | 0.221481             | 0.826391             | 0.32989               | 0.127874                | 0.263161                  | 0.765212                |
| ARPC3       | 0.789239              | 0.20269                  | 0.477735             | 0.287077             | 0.005343              | 0.132229                | 0.077977                  | 0.114383                |
| ARPC4       | 0.424674              | 0.148252                 | 0.215799             | 0.359047             | 0.020826              | 0.646602                | 0.032026                  | 0.535902                |
| ARPC4-TTLL3 | 0.351251              | 0.631775                 | 0.285006             | 0.30565              | 0.687605              | 0.845113                | 0.114793                  | 0.140725                |
| ARSB        | 0.40432               | 0.408522                 | 0.358948             | 0.044479             | 0.129893              | 0.590503                | 0.860629                  | 0.527274                |
| AXL         | 0.790335              | 0.87078                  | 0.683204             | 0.565536             | $4.31 \times 10^{-5}$ | $3.45 \times 10^{-5}$   | $7.58 \times 10^{-7}$     | 0.019673                |
| BASP1       | 0.119093              | 0.483459                 | 0.783413             | 0.489596             | 0.107959              | 0.003129                | 0.009435                  | 0.274606                |
| BCL6        | 0.055192              | 0.321332                 | 0.267893             | 0.374179             | 0.1621                | 0.293637                | 0.063477                  | 0.098955                |
| BCL9L       | 0.309213              | 0.748526                 | 0.302052             | 0.159121             | 0.259991              | 0.302401                | 0.531807                  | 0.801566                |
| BCOR        | 0.306175              | 0.592288                 | 0.259251             | 0.209548             | 0.255557              | 0.103631                | 0.050288                  | 0.129395                |
| BIN2        | 0.068567              | 0.261301                 | 0.863432             | 0.59512              | $2.48 \times 10^{-5}$ | $2.17 \times 10^{-6}$   | $3.64 \times 10^{-5}$     | 0.000261                |
| BRD2        | 0.811793              | 0.958894                 | 0.860781             | 0.45353              | 0.102588              | 0.321591                | 0.172826                  | 0.249501                |
| BRK1        | 0.120108              | 0.877693                 | 0.510748             | 0.08261              | 0.127741              | 0.083069                | 0.064228                  | 0.275784                |
| BTK         | 0.007494              | 0.321689                 | 0.701868             | 0.775787             | $4.73 \times 10^{-5}$ | $1.12 \times 10^{-5}$   | 0.000175                  | 0.004193                |
| C1GALT1     | 0.20196               | 0.559863                 | 0.13427              | 0.988472             | 0.073474              | 0.056559                | 0.022774                  | 0.130474                |
| C1GALT1C1   | 0.87247               | 0.288609                 | 0.465276             | 0.539899             | 0.459701              | 0.056122                | 0.058004                  | 0.079906                |
| C5AR1       | 0.047384              | 0.336175                 | 0.190098             | 0.324245             | 0.00108               | $3.26 \times 10^{-6}$   | $5.22 \times 10^{-5}$     | 0.396859                |
| CAB39       | 0.058716              | 0.634378                 | 0.903361             | 0.102119             | 0.000298              | 0.000165                | 0.000656                  | 0.123751                |
| CADM1       | 0.714713              | 0.394572                 | 0.703119             | 0.110067             | 0.144508              | 0.836454                | 0.05449                   | 0.045957                |
| CAPN6       | 0.005635              | 0.316163                 | 0.907238             | 0.327249             | 0.160993              | 0.171635                | 0.074795                  | 0.584517                |
| CBFA2T3     | 0.261463              | 0.096193                 | 0.386987             | 0.680434             | 0.022222              | 0.028231                | 0.213229                  | 0.041393                |
| CD1C        | 0.018873              | 0.124892                 | 0.352361             | 0.997646             | 0.144433              | 0.024957                | 0.092601                  | 0.011279                |
| CD38        | 0.016173              | 0.060108                 | 0.97444              | 0.602582             | $5.21 \times 10^{-6}$ | $3.80 \times 10^{-8}$   | $4.73 \times 10^{-5}$     | $8.65 \times 10^{-5}$   |
| CD44        | 0.584341              | 0.365224                 | 0.955621             | 0.038954             | 0.399799              | 0.003468                | 0.084751                  | 0.470915                |
| CD47        | 0.994604              | 0.587244                 | 0.918069             | 0.371743             | 0.006349              | 0.031386                | 0.017865                  | 0.024077                |

|         |          |          |          |          |                       |                       |                       |                       |
|---------|----------|----------|----------|----------|-----------------------|-----------------------|-----------------------|-----------------------|
| CD79B   | 0.015861 | 0.226156 | 0.920746 | 0.050361 | $8.15 \times 10^{-5}$ | $2.15 \times 10^{-5}$ | 0.026663              | 0.186995              |
| CDK2    | 0.043176 | 0.382108 | 0.97982  | 0.578175 | 0.090998              | 0.448044              | 0.004676              | 0.596964              |
| CEBPE   | 0.003429 | 0.467747 | 0.553824 | 0.410026 | 0.005281              | 0.000612              | 0.000707              | 0.261318              |
| CHMP1A  | 0.329269 | 0.126246 | 0.286528 | 0.419758 | 0.680166              | 0.187568              | 0.347905              | 0.745715              |
| CIITA   | 0.744674 | 0.503762 | 0.603486 | 0.674145 | 0.037386              | 0.008334              | 0.055285              | 0.010518              |
| CIT     | 0.008979 | 0.018403 | 0.291128 | 0.873422 | 0.846037              | 0.508398              | 0.97366               | 0.415089              |
| CLDN18  | 0.04822  | 0.800015 | 0.481395 | 0.064796 | 0.669398              | 0.114749              | 0.043666              | 0.701803              |
| CLIC4   | 0.374141 | 0.558879 | 0.53599  | 0.04985  | 0.141376              | 0.18826               | 0.177159              | 0.34999               |
| CMAS    | 0.439693 | 0.899064 | 0.967717 | 0.031299 | 0.766067              | 0.956777              | 0.587514              | 0.742313              |
| CMC1    | 0.953736 | 0.684117 | 0.990582 | 0.359315 | 0.389528              | 0.658461              | 0.231086              | 0.854344              |
| COX18   | 0.404722 | 0.797195 | 0.822537 | 0.933867 | 0.06429               | 0.693646              | 0.056089              | 0.760806              |
| COX5B   | 0.538765 | 0.232958 | 0.813364 | 0.313172 | 0.028267              | 0.355361              | 0.347905              | 0.16791               |
| CS      | 0.337809 | 0.603454 | 0.956965 | 0.754785 | 0.941605              | 0.489031              | 0.261377              | 0.322866              |
| CXCL6   | 0.061348 | 0.119063 | 0.607216 | 0.893903 | 0.002603              | 0.13005               | 0.021251              | 0.082966              |
| CYFIP1  | 0.096837 | 0.421915 | 0.943536 | 0.000162 | 0.198214              | 0.113094              | 0.053316              | 0.098904              |
| DOCK11  | 0.040387 | 0.397828 | 0.761477 | 0.626715 | $2.28 \times 10^{-8}$ | $3.63 \times 10^{-7}$ | $2.65 \times 10^{-8}$ | 0.000715              |
| DOCK2   | 0.146355 | 0.251499 | 0.871393 | 0.831011 | $5.79 \times 10^{-6}$ | $4.24 \times 10^{-6}$ | $3.78 \times 10^{-6}$ | 0.000576              |
| DOLPP1  | 0.279723 | 0.937938 | 0.716931 | 0.529579 | 0.797066              | 0.980713              | 0.693878              | 0.149268              |
| ELOVL1  | 0.002022 | 0.962972 | 0.557306 | 0.730551 | 0.000889              | 0.143816              | $4.15 \times 10^{-5}$ | 0.288908              |
| ELOVL6  | 0.458457 | 0.087872 | 0.848873 | 0.246568 | 0.043611              | 0.490182              | 0.006134              | 0.310876              |
| EMC1    | 0.420146 | 0.193267 | 0.966372 | 0.314702 | 0.114711              | 0.970473              | 0.539401              | 0.66021               |
| EZR     | 0.240033 | 0.636985 | 0.46219  | 0.427261 | 0.045329              | 0.196827              | 0.061413              | 0.032805              |
| FADD    | 0.012633 | 0.370279 | 0.539328 | 0.115529 | 0.356534              | 0.032212              | 0.004481              | 0.313335              |
| FAM81A  | 0.143997 | 0.065478 | 0.167763 | 0.118161 | 0.240501              | 0.107321              | 0.405553              | 0.426816              |
| FAR1    | 0.569273 | 0.166933 | 0.438912 | 0.355645 | 0.135139              | 0.094178              | 0.028357              | 0.259604              |
| FCGR1B  | 0.80022  | 0.121602 | 0.58829  | 0.619312 | 0.018306              | 0.004513              | 0.000873              | 0.051266              |
| FCGR2A  | 0.134667 | 0.052742 | 0.755061 | 0.742878 | 0.000109              | 0.000657              | $7.10 \times 10^{-7}$ | 0.062215              |
| FCGR2B  | 0.584341 | 0.002832 | 0.713155 | 0.282908 | 0.060142              | 0.014418              | 0.002957              | 0.116631              |
| FCRL3   | 0.187866 | 0.420859 | 0.727034 | 0.858981 | $7.50 \times 10^{-6}$ | $1.24 \times 10^{-6}$ | 0.000137              | 0.000126              |
| FDX1    | 0.07732  | 0.464054 | 0.906033 | 0.094551 | 0.07509               | 0.319339              | 0.146424              | 0.84956               |
| FLII    | 0.064146 | 0.020733 | 0.645249 | 0.547822 | 0.462872              | 0.663708              | 0.014155              | 0.146591              |
| FMNL1   | 0.299163 | 0.182965 | 0.664731 | 0.530673 | 0.000122              | $3.11 \times 10^{-5}$ | 0.00536               | 0.02267               |
| FMNL3   | 0.894946 | 0.974047 | 0.743554 | 0.718352 | 0.132828              | 0.241585              | 0.042161              | 0.183529              |
| FOXO1   | 0.116419 | 0.767998 | 0.6284   | 0.124353 | 0.016919              | 0.054614              | 0.001962              | 0.088878              |
| FOXO4   | 0.946367 | 0.295642 | 0.635598 | 0.023531 | 0.904398              | 0.031091              | 0.963632              | 0.608459              |
| FUT6    | 0.739973 | 0.494    | 0.271583 | 0.453085 | 0.073848              | 0.289779              | 0.281467              | 0.662999              |
| GAL3ST2 | 0.433736 | 0.147462 | 0.184609 | 0.956226 | 0.409149              | 0.651828              | 0.110648              | 0.915178              |
| GAL3ST4 | 0.476338 | 0.278111 | 0.416323 | 0.151004 | 0.095898              | 0.168111              | 0.154757              | 0.872049              |
| GCNT1   | 0.000385 | 0.878269 | 0.502116 | 0.587602 | $6.69 \times 10^{-6}$ | $3.29 \times 10^{-7}$ | $4.65 \times 10^{-7}$ | $5.89 \times 10^{-5}$ |
| GFI1    | 0.071092 | 0.065371 | 0.864758 | 0.923932 | 0.001529              | 0.00047               | 0.000153              | 0.015544              |
| GFI1B   | 0.10559  | 0.035617 | 0.276965 | 0.340489 | 0.046738              | 0.653049              | 0.074422              | 0.893039              |
| GNAI2   | 0.458026 | 0.020454 | 0.37507  | 0.67047  | 0.841419              | 0.471555              | 0.919431              | 0.470104              |
| GNE     | 0.346855 | 0.246994 | 0.9852   | 0.038249 | 0.002818              | 0.043119              | 0.00089               | 0.062695              |
| GRHL1   | 0.767403 | 0.65483  | 0.472522 | 0.633528 | 0.024876              | 0.224099              | 0.004831              | 0.287417              |
| GRSF1   | 0.458889 | 0.049691 | 0.457072 | 0.858746 | 0.297298              | 0.289266              | 0.189228              | 0.894568              |
| GTPBP3  | 0.017852 | 0.470774 | 0.448949 | 0.316963 | 0.740352              | 0.278985              | 0.276351              | 0.634167              |
| GTPBP6  | 0.866866 | 0.15073  | 0.645249 | 0.301077 | 0.231711              | 0.459112              | 0.809083              | 0.901393              |
| GYPA    | 0.191836 | 0.755853 | 0.544889 | 0.208987 | 0.172733              | 0.443011              | 0.059326              | 0.21013               |
| HDAC9   | 0.157337 | 0.019519 | 0.34327  | 0.968624 | 0.011461              | 0.022605              | 0.00148               | 0.023858              |
| HDLBP   | 0.824516 | 0.600399 | 0.184458 | 0.507074 | 0.115779              | 0.347142              | 0.789649              | 0.888191              |
| HES7    | 0.023989 | 0.164405 | 0.479231 | 0.336129 | 0.492014              | 0.035386              | 0.964045              | 0.265176              |
| HIC1    | 0.060352 | 0.629696 | 0.102245 | 0.780725 | $2.58 \times 10^{-5}$ | 0.000427              | $1.15 \times 10^{-6}$ | 0.158774              |
| HIGD2A  | 0.359029 | 0.005725 | 0.693135 | 0.031623 | 0.054521              | 0.432399              | 0.025606              | 0.052539              |

|         |                       |          |          |          |                       |                       |                       |                       |
|---------|-----------------------|----------|----------|----------|-----------------------|-----------------------|-----------------------|-----------------------|
| HMBS    | 0.304831              | 0.228407 | 0.904697 | 0.37945  | 0.71135               | 0.160288              | 0.411497              | 0.078369              |
| HMGB1   | 0.727502              | 0.977545 | 0.954278 | 0.074185 | 0.020371              | 0.034626              | 0.01339               | 0.331947              |
| HMGB2   | 0.187032              | 0.426153 | 0.356305 | 0.207682 | 0.00163               | 0.00232               | 0.000202              | 0.000487              |
| HRC     | 0.004781              | 0.425728 | 0.018735 | 0.608995 | 0.123311              | 0.002531              | 0.019387              | 0.352759              |
| ICAM1   | 0.405123              | 0.093019 | 0.316494 | 0.810792 | 0.191097              | 0.246376              | 0.099508              | 0.163026              |
| IER5L   | 0.697784              | 0.257595 | 0.659839 | 0.68724  | 0.763969              | 0.755626              | 0.226626              | 0.835158              |
| IKZF3   | 0.336376              | 0.427429 | 0.670867 | 0.712866 | $4.63 \times 10^{-5}$ | $4.50 \times 10^{-6}$ | 0.00024               | $2.80 \times 10^{-5}$ |
| IQGAP2  | 0.003602              | 0.231529 | 0.728301 | 0.284243 | 0.001614              | 0.071961              | 0.000135              | 0.004373              |
| IRX5    | 0.007321              | 0.345813 | 0.773068 | 0.033324 | 0.001093              | $8.86 \times 10^{-7}$ | 0.000106              | 0.440437              |
| ISL2    | 0.849883              | 0.410756 | 0.781845 | 0.346906 | 0.024558              | 0.501253              | 0.000106              | 0.060281              |
| ITGAL   | 0.105733              | 0.100206 | 0.728301 | 0.475498 | 0.000258              | $7.82 \times 10^{-6}$ | 0.00127               | 0.001217              |
| ITGB2   | 0.076844              | 0.050289 | 0.906033 | 0.321303 | 0.000188              | $2.57 \times 10^{-6}$ | 0.00024               | 0.002717              |
| JAK1    | 0.191108              | 0.462717 | 0.296556 | 0.858482 | 0.036744              | 0.023208              | 0.008268              | 0.175138              |
| JMJD1C  | 0.880888              | 0.192268 | 0.797701 | 0.468243 | $2.11 \times 10^{-5}$ | 0.012237              | $1.26 \times 10^{-5}$ | 0.129474              |
| KIF23   | 0.17701               | 0.014539 | 0.53488  | 0.247034 | 0.401634              | 0.062127              | 0.159678              | 0.0265                |
| KLF6    | 0.011631              | 0.168962 | 0.752499 | 0.812956 | 0.89216               | 0.643691              | 0.745622              | 0.320898              |
| LAMTOR2 | 0.144192              | 0.116241 | 0.474603 | 0.84202  | 0.249804              | 0.169452              | 0.069049              | 0.092615              |
| LAMTOR4 | 0.024918              | 0.18105  | 0.880698 | 0.629224 | 0.000775              | 0.025003              | 0.000153              | 0.036854              |
| LCA5L   | 0.215884              | 0.344319 | 0.170376 | 0.62924  | 0.090975              | 0.69776               | 0.038288              | 0.258484              |
| LCE1A   | 0.264211              | 0.086751 | 0.794603 | 0.782277 | 0.000513              | 0.000242              | $1.06 \times 10^{-5}$ | 0.536714              |
| LCK     | 0.241174              | 0.11189  | 0.97444  | 0.477061 | 0.000506              | $3.99 \times 10^{-5}$ | 0.002012              | 0.001965              |
| LCMT1   | 0.154431              | 0.469875 | 0.205958 | 0.187235 | 0.097978              | 0.000659              | 0.050534              | 0.345707              |
| LDB1    | 0.01404               | 0.931543 | 0.077746 | 0.025461 | 0.558128              | 0.001114              | 0.404371              | 0.92826               |
| LIMK2   | 0.253979              | 0.076915 | 0.375979 | 0.243447 | 0.973668              | 0.329537              | 0.452632              | 0.500402              |
| LIPT2   | 0.123367              | 0.373411 | 0.636801 | 0.031235 | 0.677777              | 0.264152              | 0.975332              | 0.6552                |
| LPIN2   | 0.390426              | 0.585231 | 0.573272 | 0.76507  | 0.205782              | 0.041081              | 0.011412              | 0.087487              |
| LRRC15  | 0.041797              | 0.354674 | 0.913386 | 0.350132 | 0.005078              | 0.175887              | 0.020789              | 0.007183              |
| MAK     | 0.460617              | 0.53938  | 0.273763 | 0.274553 | 0.371854              | 0.359409              | 0.014404              | 0.587339              |
| MAML1   | 0.692524              | 0.800584 | 0.958308 | 0.201312 | 0.07043               | 0.049746              | 0.005922              | 0.124207              |
| MAML2   | 0.270023              | 0.256674 | 0.656179 | 0.162021 | 0.009741              | 0.253002              | 0.000339              | 0.086173              |
| MAML3   | 0.65922               | 0.019788 | 0.58365  | 0.000161 | 0.000246              | 0.041046              | 0.001137              | 0.352977              |
| MAP3K10 | $5.71 \times 10^{-5}$ | 0.399871 | 0.997309 | 0.811962 | 0.366158              | 0.056844              | 0.043125              | 0.366355              |
| MAP3K3  | 0.158174              | 0.017551 | 0.432952 | 0.042703 | 0.792416              | 0.33012               | 0.556155              | 0.142319              |
| MAPK1   | 0.042956              | 0.430843 | 0.978474 | 0.218566 | 0.462229              | 0.485009              | 0.334087              | 0.77535               |
| MECR    | 0.036396              | 0.305541 | 0.912717 | 0.75887  | 0.022861              | 0.001037              | 0.012293              | 0.18736               |
| MED13   | 0.974729              | 0.056231 | 0.53599  | 0.080425 | 0.000854              | 0.008297              | 0.000262              | 0.218707              |
| MEX3B   | 0.602068              | 0.227561 | 0.395371 | 0.12185  | 0.392849              | 0.283789              | 0.036844              | 0.105556              |
| MGAT1   | 0.931077              | 0.089378 | 0.263548 | 0.549823 | 0.036737              | 0.147368              | 0.41329               | 0.528599              |
| MIB2    | 0.223099              | 0.261301 | 0.787303 | 0.585766 | 0.498656              | 0.950778              | 0.792071              | 0.534305              |
| MOB3A   | 0.189662              | 0.05981  | 0.573272 | 0.323802 | 0.175476              | 0.021589              | 0.207127              | 0.123401              |
| MS4A1   | 0.128827              | 0.447705 | 0.630791 | 0.399428 | 0.000113              | $1.59 \times 10^{-5}$ | 0.00264               | 0.006695              |
| MS4A14  | 0.630115              | 0.394572 | 0.113698 | 0.90122  | 0.669628              | 0.158115              | 0.079763              | 0.353253              |
| MS4A7   | 0.073807              | 0.277463 | 0.056053 | 0.955189 | 0.001285              | 0.00012               | $3.67 \times 10^{-5}$ | 0.046488              |
| MSN     | 0.99858               | 0.622961 | 0.241871 | 0.284036 | 0.82772               | 0.159605              | 0.675395              | 0.564199              |
| MTIF3   | 0.453724              | 0.441613 | 0.934145 | 0.133042 | 0.063598              | 0.347967              | 0.269473              | 0.513925              |
| MTO1    | 0.984382              | 0.619863 | 0.498899 | 0.269174 | $4.79 \times 10^{-5}$ | 0.000106              | $3.42 \times 10^{-6}$ | 0.001654              |
| MUC1    | 0.21247               | 0.072274 | 0.603486 | 0.63419  | 0.053991              | 0.204167              | 0.128145              | 0.566241              |
| MUC12   | 0.287716              | 0.928057 | 0.034458 | 0.431446 | 0.883206              | 0.051721              | 0.471133              | 0.470989              |
| MUC21   | 0.461179              | 0.77517  | 0.466616 | 0.639812 | 0.487665              | 0.785703              | 0.617937              | 0.189274              |
| MYC     | 0.866866              | 0.417702 | 0.276731 | 0.603186 | 0.540088              | 0.544117              | 0.7243                | 0.915635              |
| MYO9B   | 0.001154              | 0.781997 | 0.426059 | 0.559185 | 0.892867              | 0.213925              | 0.374354              | 0.872797              |
| NANS    | 0.625066              | 0.807371 | 0.780823 | 0.22361  | 0.125831              | 0.946767              | 0.1292                | 0.77466               |

|         |          |          |          |          |                       |                       |                       |                       |
|---------|----------|----------|----------|----------|-----------------------|-----------------------|-----------------------|-----------------------|
| NCKAP1L | 0.060255 | 0.273921 | 0.783413 | 0.505985 | $4.60 \times 10^{-5}$ | $3.40 \times 10^{-7}$ | $3.64 \times 10^{-5}$ | 0.00069               |
| NDUFA1  | 0.752227 | 0.572729 | 0.276731 | 0.123779 | 0.199342              | 0.259202              | 0.020731              | 0.227413              |
| NDUFA8  | 0.831172 | 0.243726 | 0.332222 | 0.525589 | 0.135763              | 0.27853               | 0.041633              | 0.660525              |
| NDUFA9  | 0.405123 | 0.813039 | 0.272288 | 0.570684 | 0.404355              | 0.046512              | 0.279135              | 0.589688              |
| NDUFAF3 | 0.126694 | 0.111725 | 0.796399 | 0.347686 | 0.095104              | 0.57551               | 0.038582              | 0.086483              |
| NDUFAF5 | 0.80022  | 0.823834 | 0.07331  | 0.102222 | 0.006823              | 0.020771              | 0.025399              | 0.254937              |
| NDUFAF7 | 0.614019 | 0.407279 | 0.539328 | 0.365269 | 0.056157              | 0.669355              | 0.007007              | 0.358381              |
| NDUFB11 | 0.665416 | 0.012601 | 0.23582  | 0.832842 | 0.009055              | 0.334961              | 0.010027              | 0.822557              |
| NDUFB4  | 0.214041 | 0.500502 | 0.956965 | 0.757978 | 0.389862              | 0.604847              | 0.066525              | 0.881651              |
| NDUFB6  | 0.484753 | 0.054188 | 0.701868 | 0.696738 | 0.116909              | 0.194756              | 0.145843              | 0.092439              |
| NDUFB9  | 0.357168 | 0.376165 | 0.23582  | 0.079483 | 0.009635              | 0.445914              | 0.158436              | 0.339087              |
| NDUFC1  | 0.912425 | 0.890968 | 0.589452 | 0.940775 | 0.898891              | 0.192374              | 0.522903              | 0.220394              |
| NDUFS2  | 0.280357 | 0.90717  | 0.946221 | 0.895209 | 0.87076               | 0.071111              | 0.523586              | 0.130757              |
| NDUFS6  | 0.218803 | 0.799454 | 0.356305 | 0.007365 | 0.029773              | 0.050142              | 0.0959                | 0.469013              |
| NDUFS7  | 0.067386 | 0.523078 | 0.932804 | 0.316129 | 0.229169              | 0.024818              | 0.01255               | 0.016483              |
| NDUFS8  | 0.403518 | 0.142792 | 0.253598 | 0.136349 | 0.08021               | 0.037645              | 0.001351              | 0.077311              |
| NDUFV1  | 0.069985 | 0.434702 | 0.42704  | 0.152971 | 0.026265              | 0.00156               | 0.000267              | 0.073269              |
| NFIA    | 0.000845 | 0.960059 | 0.587128 | 0.150405 | 0.000478              | 0.012109              | 0.000339              | 0.20094               |
| NHLRC2  | 0.170702 | 0.094451 | 0.77565  | 0.709633 | 0.001619              | 0.065453              | 0.000873              | 0.127308              |
| NUBPL   | 0.756012 | 0.788179 | 0.91138  | 0.119939 | 0.523468              | 0.940688              | 0.246118              | 0.594375              |
| NUP153  | 0.864067 | 0.545194 | 0.987891 | 0.580427 | 0.004393              | 0.005257              | 0.001298              | 0.203429              |
| NXT1    | 0.286427 | 0.655358 | 0.663507 | 0.00714  | 0.109821              | 0.146113              | 0.249118              | 0.829562              |
| OSR2    | 0.747368 | 0.01576  | 0.58829  | 0.237439 | 0.229934              | 0.609714              | 0.062291              | 0.213357              |
| OSTC    | 0.000611 | 0.83238  | 0.147458 | 0.204244 | 0.018447              | 0.004689              | 0.008293              | 0.908969              |
| OTUB1   | 0.98211  | 0.235257 | 0.045318 | 0.148278 | 0.551417              | 0.006718              | 0.277741              | 0.552061              |
| OTUD5   | 0.475017 | 0.319552 | 0.990582 | 0.847874 | 0.112183              | 0.998616              | 0.157203              | 0.081254              |
| PDCD10  | 0.717903 | 0.89328  | 0.903361 | 0.436604 | 0.264463              | 0.270326              | 0.108425              | 0.040985              |
| PDE12   | 0.326102 | 0.854116 | 0.342412 | 0.523615 | 0.669219              | 0.418503              | 0.2175                | 0.786146              |
| PIK3AP1 | 0.013737 | 0.287945 | 0.898021 | 0.425729 | $6.37 \times 10^{-7}$ | $3.74 \times 10^{-8}$ | $7.07 \times 10^{-7}$ | 0.000448              |
| PIK3R5  | 0.119431 | 0.145402 | 0.742279 | 0.437478 | $7.46 \times 10^{-5}$ | $3.91 \times 10^{-5}$ | $7.95 \times 10^{-5}$ | 0.003289              |
| PNMA5   | 0.079893 | 0.222316 | 0.751438 | 0.166734 | 0.023491              | 0.006238              | 0.019608              | 0.021782              |
| PODXL   | 0.010744 | 0.210573 | 0.120797 | 0.514594 | 0.011284              | 0.001016              | 0.010943              | 0.249292              |
| POU2AF1 | 0.131998 | 0.210306 | 0.782118 | 0.307541 | 0.000807              | $1.60 \times 10^{-5}$ | 0.017664              | 0.006567              |
| POU2F2  | 0.019163 | 0.307963 | 0.784709 | 0.498382 | $2.62 \times 10^{-5}$ | $8.21 \times 10^{-7}$ | $1.76 \times 10^{-5}$ | 0.000433              |
| PPP3CA  | 0.964513 | 0.107508 | 0.124475 | 0.109655 | 0.000643              | 0.003075              | $2.96 \times 10^{-5}$ | 0.403413              |
| PRDM1   | 0.014208 | 0.05766  | 0.843591 | 0.415077 | 0.001662              | $3.62 \times 10^{-5}$ | 0.000191              | 0.013019              |
| PRKCD   | 0.053233 | 0.191272 | 0.087275 | 0.743294 | 0.747293              | 0.256866              | 0.893683              | 0.979299              |
| PTDSS1  | 0.168051 | 0.218949 | 0.47669  | 0.304042 | 0.447307              | 0.428419              | 0.091589              | 0.41163               |
| PTEN    | 0.538765 | 0.175393 | 0.701868 | 0.156479 | 0.071441              | 0.136568              | 0.108194              | 0.227483              |
| PTPN11  | 0.614019 | 0.08479  | 0.402915 | 0.665119 | 0.057351              | 0.098313              | 0.00874               | 0.159573              |
| PTPN6   | 0.100763 | 0.10687  | 0.76791  | 0.578768 | 0.001003              | $6.33 \times 10^{-5}$ | 0.001848              | 0.000631              |
| PTPRC   | 0.054383 | 0.363677 | 0.776943 | 0.871627 | $2.36 \times 10^{-7}$ | $8.46 \times 10^{-8}$ | $9.80 \times 10^{-7}$ | $5.34 \times 10^{-5}$ |
| QPCTL   | 0.033806 | 0.700839 | 0.783413 | 0.432976 | 0.001982              | 0.10218               | 0.000169              | 0.479262              |
| RAC1    | 0.473259 | 0.199598 | 0.014142 | 0.905773 | 0.605536              | 0.089159              | 0.592577              | 0.617155              |
| RAC2    | 0.166301 | 0.025301 | 0.314868 | 0.200076 | 0.000283              | $1.96 \times 10^{-6}$ | 0.002026              | 0.038265              |
| RCOR1   | 0.317412 | 0.632816 | 0.87405  | 0.229964 | 0.148535              | 0.271525              | 0.034631              | 0.605592              |
| RHOH    | 0.050572 | 0.086521 | 0.966372 | 0.571428 | $2.28 \times 10^{-5}$ | $1.26 \times 10^{-6}$ | 0.000234              | 0.000202              |
| RNF122  | 0.575569 | 0.619863 | 0.466307 | 0.115552 | 0.039057              | 0.124457              | 0.008449              | 0.696285              |
| RPL21   | 0.510472 | 0.469875 | 0.918069 | 0.048894 | 0.0223                | 0.272568              | 0.004768              | 0.658488              |
| RRAGA   | 0.717371 | 0.55055  | 0.973095 | 0.167257 | 0.627535              | 0.199528              | 0.893683              | 0.33364               |
| RTN4IP1 | 0.73339  | 0.602435 | 0.700618 | 0.364755 | 0.007472              | 0.037595              | 0.018326              | 0.022764              |
| SAMD4B  | 0.008886 | 0.16205  | 0.729568 | 0.845061 | 0.163926              | 0.919949              | 0.346829              | 0.682054              |

|            |          |          |          |          |                       |                       |                       |                       |
|------------|----------|----------|----------|----------|-----------------------|-----------------------|-----------------------|-----------------------|
| SASH3      | 0.169815 | 0.093162 | 0.940852 | 0.639026 | 0.000214              | $2.10 \times 10^{-5}$ | 0.000952              | 0.001306              |
| SIRPA      | 0.31983  | 0.620379 | 0.735914 | 0.592168 | 0.553421              | 0.731038              | 0.093009              | 0.676667              |
| SIX4       | 0.185136 | 0.093162 | 0.053084 | 0.390162 | 0.001625              | 0.010437              | 0.001894              | 0.074441              |
| SLA        | 0.044366 | 0.356769 | 0.800306 | 0.383509 | $5.58 \times 10^{-6}$ | $1.88 \times 10^{-6}$ | $3.65 \times 10^{-6}$ | 0.000945              |
| SLA2       | 0.526146 | 0.195024 | 0.710641 | 0.614012 | 0.002694              | 0.000293              | 0.004722              | 0.000761              |
| SLC25A1    | 0.801321 | 0.935031 | 0.26211  | 0.711404 | 0.095639              | 0.139549              | 0.001496              | 0.179991              |
| SLC35A1    | 0.033806 | 0.197556 | 0.11065  | 0.391599 | 0.044841              | 0.03752               | 0.000375              | 0.037801              |
| SLC39A13   | 0.200454 | 0.221977 | 0.553913 | 0.710231 | 0.142113              | 0.017174              | 0.027981              | 0.041395              |
| SLC39A9    | 0.984382 | 0.838088 | 0.485086 | 0.00255  | 0.040659              | 0.229389              | 0.549842              | 0.328385              |
| SLC9A3R1   | 0.893258 | 0.096193 | 0.891352 | 0.77828  | 0.424778              | 0.194168              | 0.272668              | 0.405117              |
| SMAGP      | 0.212731 | 0.524983 | 0.631995 | 0.908777 | 0.598496              | 0.597517              | 0.871348              | 0.938258              |
| SMARCC1    | 0.356053 | 0.333245 | 0.947563 | 0.237441 | 0.041228              | 0.198542              | 0.006855              | 0.035321              |
| SPI1       | 0.250441 | 0.054188 | 0.963684 | 0.229079 | 0.006541              | 0.000199              | 0.004706              | 0.021096              |
| SPIB       | 0.214829 | 0.161174 | 0.425079 | 0.364172 | 0.008578              | $6.40 \times 10^{-5}$ | 0.04919               | 0.288873              |
| SPN        | 0.257254 | 0.168962 | 0.688163 | 0.276664 | 0.00071               | $1.23 \times 10^{-5}$ | 0.001874              | 0.723164              |
| SPPL3      | 0.233544 | 0.926314 | 0.360718 | 0.174405 | 0.144463              | 0.023408              | 0.046016              | 0.608782              |
| SPTLC2     | 0.771756 | 0.815876 | 0.373257 | 0.202797 | 0.173445              | 0.202302              | 0.189935              | 0.279263              |
| SPTSSA     | 0.034835 | 0.418122 | 0.172488 | 0.584001 | 0.221773              | 0.31581               | 0.192069              | 0.821731              |
| SS18       | 0.250148 | 0.897328 | 0.097043 | 0.298276 | 0.475554              | 0.1808                | 0.035539              | 0.975022              |
| ST3GAL1    | 0.007212 | 0.140613 | 0.265714 | 0.268109 | $5.08 \times 10^{-5}$ | 0.001841              | $7.78 \times 10^{-5}$ | 0.272784              |
| ST3GAL2    | 0.645366 | 0.633336 | 0.690647 | 0.06914  | 0.396436              | 0.274343              | 0.045675              | 0.98674               |
| ST6GALNAC1 | 0.380294 | 0.285793 | 0.440408 | 0.214064 | 0.302496              | 0.828413              | 0.051909              | 0.236186              |
| STARD7     | 0.264498 | 0.680362 | 0.752499 | 0.454178 | 0.40693               | 0.462542              | 0.388033              | 0.003867              |
| STK4       | 0.427571 | 0.880576 | 0.229223 | 0.942121 | 0.000339              | $2.08 \times 10^{-5}$ | 0.000191              | 0.117779              |
| SUPT20H    | 0.051078 | 0.245505 | 0.895352 | 0.439252 | $2.70 \times 10^{-5}$ | 0.00111               | 0.000447              | 0.765212              |
| SYK        | 0.058053 | 0.027175 | 0.952935 | 0.913526 | 0.000836              | 0.001751              | 0.000167              | 0.114383              |
| SYT1       | 0.72908  | 0.75516  | 0.76274  | 0.158833 | 0.001128              | 0.461065              | $2.98 \times 10^{-5}$ | 0.535902              |
| TACO1      | 0.017613 | 0.859855 | 0.424101 | 0.047159 | 0.022449              | 0.016631              | 0.06637               | 0.140725              |
| TIMMDC1    | 0.075196 | 0.976962 | 0.158106 | 0.091262 | 0.10993               | 0.054327              | 0.065906              | 0.527274              |
| TLE3       | 0.221481 | 0.597352 | 0.392564 | 0.339248 | 0.728641              | 0.728964              | 0.241454              | 0.019673              |
| TM2D1      | 0.112498 | 0.359829 | 0.132525 | 0.502994 | 0.288413              | 0.58219               | 0.897829              | 0.274606              |
| TM2D2      | 0.431312 | 0.341714 | 0.040636 | 0.409311 | 0.067673              | 0.048532              | 0.690012              | 0.098955              |
| TM9SF3     | 0.173384 | 0.083347 | 0.451986 | 0.652455 | 0.010078              | 0.288764              | 0.068093              | 0.801566              |
| TMEM119    | 0.193048 | 0.53938  | 0.711897 | 0.253672 | 0.624954              | 0.263019              | 0.775962              | 0.129395              |
| TMEM165    | 0.641284 | 0.859855 | 0.051045 | 0.14323  | 0.084167              | 0.019964              | 0.040491              | 0.000261              |
| TMEM38B    | 0.931643 | 0.37106  | 0.782118 | 0.904015 | 0.300291              | 0.192532              | 0.071651              | 0.249501              |
| TP73       | 0.826733 | 0.103573 | 0.008778 | 0.560225 | 0.150511              | 0.091047              | 0.309022              | 0.275784              |
| TSC2       | 0.375674 | 0.89039  | 0.383296 | 0.117337 | 0.569932              | 0.195012              | 0.412094              | 0.004193              |
| TSPAN15    | 0.284821 | 0.343201 | 0.528242 | 0.006564 | 0.804519              | 0.554996              | 0.808271              | 0.130474              |
| UBE2D3     | 0.776117 | 0.861004 | 0.812056 | 0.4633   | 0.032006              | 0.116396              | 0.004236              | 0.079906              |
| UBE2J1     | 0.155257 | 0.94201  | 0.118393 | 0.895866 | 0.001888              | $3.97 \times 10^{-5}$ | 0.0002                | 0.396859              |
| UBE2K      | 0.463651 | 0.252104 | 0.330543 | 0.719879 | 0.05772               | 0.028195              | 0.101462              | 0.123751              |
| UBR4       | 0.443919 | 0.305886 | 0.460139 | 0.126922 | 0.628336              | 0.115258              | 0.547048              | 0.045957              |
| UQCC1      | 0.238611 | 0.478907 | 0.339846 | 0.753582 | 0.653668              | 0.258933              | 0.475013              | 0.584517              |
| USP22      | 0.879765 | 0.296994 | 0.442911 | 0.049824 | 0.604066              | 0.002492              | 0.290463              | 0.041393              |
| USP34      | 0.360897 | 0.213787 | 0.87405  | 0.167136 | $3.08 \times 10^{-5}$ | 0.00443               | $1.17 \times 10^{-5}$ | 0.011279              |
| VCAM1      | 0.003264 | 0.264731 | 0.859457 | 0.951797 | $7.51 \times 10^{-7}$ | $2.11 \times 10^{-6}$ | $1.10 \times 10^{-7}$ | $8.65 \times 10^{-5}$ |
| VPS37A     | 0.78267  | 0.445091 | 0.151265 | 0.069109 | 0.151723              | 0.121884              | 0.067305              | 0.470915              |
| VSIG8      | 0.768483 | 0.80963  | 0.870062 | 0.005348 | 0.977363              | 0.23527               | 0.990382              | 0.024077              |
| WASF2      | 0.772846 | 0.011456 | 0.478781 | 0.051934 | 0.560452              | 0.180916              | 0.20864               | 0.186995              |
| WDR1       | 0.058716 | 0.24939  | 0.276731 | 0.047683 | 0.430494              | 0.012417              | 0.309521              | 0.596964              |
| XPR1       | 0.266331 | 0.016111 | 0.936827 | 0.228686 | 0.031729              | 0.630677              | 0.065139              | 0.261318              |
| YBEY       | 0.98495  | 0.294293 | 0.266439 | 0.494308 | 0.117586              | 0.1976                | 0.077977              | 0.745715              |

|         |          |                       |          |          |          |          |          |          |
|---------|----------|-----------------------|----------|----------|----------|----------|----------|----------|
| ZBTB7A  | 0.312953 | 0.564301              | 0.878038 | 0.259705 | 0.965615 | 0.748773 | 0.568884 | 0.010518 |
| ZBTB7B  | 0.112337 | 0.112716              | 0.684442 | 0.027568 | 0.105145 | 0.06472  | 0.006705 | 0.415089 |
| ZC3HAV1 | 0.571207 | 0.823265              | 0.993273 | 0.289552 | 0.290947 | 0.653614 | 0.489386 | 0.701803 |
| ZDBF2   | 0.096908 | 0.932706              | 0.864758 | 0.285997 | 0.01229  | 0.054132 | 0.000929 | 0.34999  |
| ZEB2    | 0.672154 | 0.785367              | 0.789899 | 0.059641 | 0.344262 | 0.138644 | 0.20902  | 0.742313 |
| ZFX     | 0.47019  | $4.86 \times 10^{-8}$ | 0.670867 | 0.154893 | 0.05839  | 0.031954 | 0.007794 | 0.854344 |
| ZNF217  | 0.264194 | 0.333245              | 0.830418 | 0.763401 | 0.010725 | 0.000676 | 0.001874 | 0.760806 |
| ZNF311  | 0.925986 | 0.070098              | 0.201757 | 0.188858 | 0.486605 | 0.46144  | 0.580315 | 0.16791  |
| ZNF683  | 0.433607 | 0.008591              | 0.783413 | 0.215445 | 0.426208 | 0.101224 | 0.227634 | 0.322866 |
| ZNF746  | 0.806277 | 0.866177              | 0.124889 | 0.872905 | 0.545733 | 0.287973 | 0.721158 | 0.082966 |

<sup>1</sup>Differences in the expression of phagocytosis regulators between age subgroups and the results are expressed as *P* values. If the *P*-value is less than 0.05, it means that this phagocytosis regulator has a significant difference in expression between age subgroups.

<sup>2</sup>Differences in the expression of phagocytosis regulators between gender subgroups and the results are expressed as *P* values. If the *P*-value is less than 0.05, it means that this phagocytosis regulator has a significant difference in expression between gender subgroups.

<sup>3</sup>Differences in the expression of phagocytosis regulators between pathologic\_M subgroups and the results are expressed as *P* values. If the *P*-value is less than 0.05, it means that this phagocytosis regulator has a significant difference in expression between pathologic\_M subgroups.

<sup>4</sup>Differences in the expression of phagocytosis regulators between pathologic\_N subgroups and the results are expressed as *P* values. If the *P*-value is less than 0.05, it means that this phagocytosis regulator has a significant difference in expression between pathologic\_N subgroups.

<sup>5</sup>Differences in the expression of phagocytosis regulators between pathologic\_T subgroups and the results are expressed as *P* values. If the *P*-value is less than 0.05, it means that this phagocytosis regulator has a significant difference in expression between pathologic\_T subgroups.

<sup>6</sup>Differences in the expression of phagocytosis regulators between tumor\_stage subgroups and the results are expressed as *P* values. If the *P*-value is less than 0.05, it means that this phagocytosis regulator has a significant difference in expression between tumor\_stage subgroups.

<sup>7</sup>Differences in the expression of phagocytosis regulators between breslow\_depth subgroups and the results are expressed as *P* values. If the *P*-value is less than 0.05, it means that this phagocytosis regulator has a significant difference in expression between breslow\_depth subgroups.

<sup>8</sup>Differences in the expression of phagocytosis regulators between clark\_level subgroups and the results are expressed as *P* values. If the *P*-value is less than 0.05, it means that this phagocytosis regulator has a significant difference in expression between clark\_level subgroups.

**Table S2.** The primer sequences.

| Primer name | Base sequence (5' to 3') |
|-------------|--------------------------|
| ACTR3-F     | TTCAACCATGTTTCAGGGACTTTG |
| ACTR3-R     | ACCACCACTCAATTCCTCACT    |
| AXL-F       | GTGGGCAACCCAGGGAATATC    |
| AXL-R       | GTACTGTCCCGTGTTCGAAAG    |
| BIN2-F      | GGTCGAAACTCGTGGACTAT     |
| BIN2-R      | GAAGACATCCCTCAAGTTGGAAA  |
| CIITA-F     | CCTGGAGCTTCTTAACAGCGA    |
| CIITA-R     | TGTGTCGGGTCTGAGTAGAG     |
| CD38-F      | CAACTCTGTCTTGGCGTCAGT    |
| CD38-R      | CCCATACACTTTGGCAGTCTACA  |
| DOCK2-F     | AGCACAAAATGTTACAGGGCA    |

|          |                         |
|----------|-------------------------|
| DOCK2-R  | CCATCAGATCGTACATCATGGAC |
| FCGR1B-F | TGGGTCAGCGTGTCCAAG      |
| FCGR1B-R | GTCACCTCGCCCTGAGAGAC    |
| FCGR2A-F | TTTGAGATGAGTAATCCCAGCCA |
| FCGR2A-R | TCAGGCCCAGTCTCCATTTTA   |
| FCRL3-F  | AGCTCTTCCACGCCCATAGA    |
| FCRL3-R  | ATCCGAGGGTCTGGCTATCTC   |

**Table S3.** Basic information about the patients.

| Number | Age | Gender | Site of lesion occurrence | TNM staging<br>(ACJJ Staging Eighth Edition) |
|--------|-----|--------|---------------------------|----------------------------------------------|
| 1      | 51  | male   | Face                      | T2bN0M0-IIA                                  |
| 2      | 46  | male   | Neck                      | T1aN1bM0-IIIB                                |
| 3      | 49  | male   | Anterior chest            | T3aN2bM0-IIIB                                |
| 4      | 42  | male   | Face                      | T2aN0M0-IB                                   |
| 5      | 57  | male   | Face                      | T2aN1aM0-IIIA                                |
| 6      | 52  | male   | Upper Extremity           | T2bN1aM0-IIIB                                |
| 7      | 42  | male   | Palm                      | T2bN0M0-IIA                                  |
| 8      | 63  | male   | Neck                      | T3bN3bM0-IIIC                                |
| 9      | 54  | male   | Face                      | T2bN1bM0-IIIB                                |
| 10     | 50  | male   | Upper Extremity           | T3aN3aM0-IIIC                                |
| 11     | 46  | male   | Upper Extremity           | T2bN0M0-IIA                                  |
| 12     | 49  | male   | Face                      | T2bN1aM0-IIIB                                |
| 13     | 54  | male   | Neck                      | T2bN1aM0-IIIB                                |
| 14     | 57  | male   | Anterior chest            | T3bN3bM0-IIIC                                |
| 15     | 52  | male   | Palm                      | T2bN1bM0-IIIB                                |
| 16     | 45  | male   | Upper Extremity           | T2aN0M0-IB                                   |
| 17     | 57  | male   | Palm                      | T2bN0M0-IIA                                  |
| 18     | 59  | male   | Lower extremities         | T3bN3bM0-IIIC                                |
| 19     | 46  | female | Palm                      | T2bN0M0-IIA                                  |
| 20     | 49  | female | Neck                      | T2bN1bM0-IIIB                                |
| 21     | 50  | female | Neck                      | T1bN0M0-IA                                   |
| 22     | 50  | female | Palm                      | T3aN2bM0-IIIB                                |
| 23     | 57  | female | Lower extremities         | T2bN0M0-IIA                                  |
| 24     | 49  | female | Face                      | T1aN0M0-IA                                   |
| 25     | 41  | female | Lower extremities         | T2aN0M0-IB                                   |
| 26     | 54  | female | Face                      | T2bN0M0-IIA                                  |
| 27     | 46  | female | Palm                      | T1aN0M0-IA                                   |
| 28     | 51  | female | Face                      | T2aN1bM0-IIIB                                |
| 29     | 50  | female | Anterior chest            | T2bN0M0-IIA                                  |
| 30     | 48  | female | Neck                      | T1bN0M0-IA                                   |
